# Supplementary material for: Factors Influencing HIV Drug Resistance among Pregnant Women in Luanda, Angola: Findings from a Cross-Sectional Study
Source: MDPI journal article supplement (doi:10.3390/tropicalmed6010029), 2021-03-05
Supplement: s1 [file s1]

# Genetic Diversity and Drug Resistance of HIV-1 Among Infected Pregnant Women Newly Diagnosed in Luanda, Angola

## DATA COLLECTION FORM (Translated from Portuguese)

### 1. Sociodemographic data

Age \_\_\_\_ years

Municipality of residence in Luanda \_\_\_\_\_

Occupation \_\_\_\_\_

Current level of education: \_\_\_\_ Illiterate \_\_\_\_ Basic \_\_\_\_ Medium \_\_\_\_ Superior

Gestational age (trimester) \_\_\_\_ 1st trimester \_\_\_\_ 2nd trimester \_\_\_\_ 3rd trimester \_\_\_\_ Parturient

### 2. Laboratory results

Rapid Test Determine HIV 1/2

\_\_\_\_ Negative

\_\_\_\_ Positive

If TR Determine HIV 1/2 positive, perform TR UniGold HIV

\_\_\_\_ Negative

\_\_\_\_ Positive

#### 2.1. Results of molecular analysis

Type of HIV-1 \_\_\_\_\_

HIV-1 subtype \_\_\_\_\_

Drug resistance mutation

\_\_\_\_ No

\_\_\_\_ Yes

If have a drug resistance mutation, which ARV class is affected

\_\_\_\_ ITRN

\_\_\_\_ ITNNN

\_\_\_\_ IP

If have a drug resistance mutation, which the resistance profile

\_\_\_\_ Low

\_\_\_\_ Intermediate

\_\_\_\_ High

### 3. Other information

Co-infection with any viral or bacterial etiological agent

\_\_\_\_ No

\_\_\_\_ Yes

If yes, indicate co-infection

\_\_\_\_ VHB

\_\_\_\_ VHC

\_\_\_\_ Syphilis  
\_\_\_\_ TB  
\_\_\_\_ Other (s), please indicate \_\_\_\_\_

Date \_\_\_\_\_ : Reseracher : \_\_\_\_\_
